# Supplementary material for: The development of a rapid self-healing semiconducting monoethanolamine-based Mg(OH)2 metallogel for a Schottky diode application with a high ON/OFF ratio
Source: Royal Society of Chemistry journal article supplement (doi:10.1039/c9nj03457a), 2019-01-01
Supplement: c9nj03457a1.pdf [file c9nj03457a1.pdf]

## Electronic Supplementary Information †

### Development of a rapid self-healing semiconducting monoethanolamine based $\text{Mg}(\text{OH})_2$ -metallogel for Schottky diode application with high On/Off ratio †

Subhendu Dhibar,<sup>a</sup> Arka Dey,<sup>b,c</sup> Amiya Dey,<sup>a</sup> Santanu Majumdar,<sup>a</sup> Amit Mandal,<sup>d</sup> Partha Pratim Ray,<sup>\*c</sup> Biswajit Dey<sup>\*a</sup>

<sup>a</sup>Department of Chemistry, Visva-Bharati University, Santiniketan 731235, India

\*E-mail: bdeychem@gmail.com

<sup>b</sup>Department of Condensed Matter Physics and Material Sciences, S. N. Bose National Centre for Basic Sciences, Block JD, Sec. III, Salt Lake, Kolkata 700106, India

<sup>c</sup>Department of Physics, Jadavpur University, Jadavpur, Kolkata, 700 032, India

\*E-mail: partha@phys.jdpu.ac.in

<sup>d</sup>Department of Chemistry, Behala College, Kolkata-700060, India

**Powder X-ray Diffraction Study:**

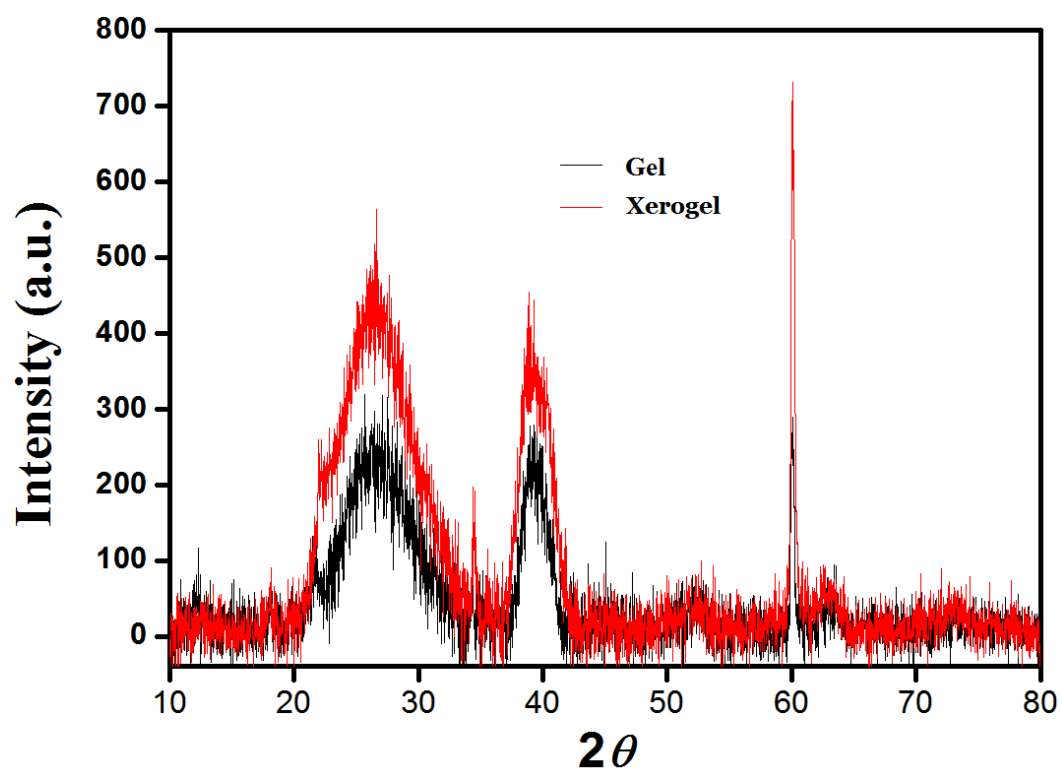

**Fig. S1.** PXRD patterns of Mg@MEA metallogel in its gel-state and xerogel-form.

## NMR Studies of Mg@MEA metallogel:

**Mg@MEA:** White gel;  $^1\text{H}$  NMR (400 MHz,  $\text{DMSO-}d_6$ ):  $\delta$  3.44-3.47 (t, 1H,  $J = 12\text{Hz}$ ), 2.72-2.69 (t, 1H);  $^{13}\text{C}$  NMR (100 MHz,  $\text{DMSO-}d_6$ ):  $\delta$  60.80, 43.08.

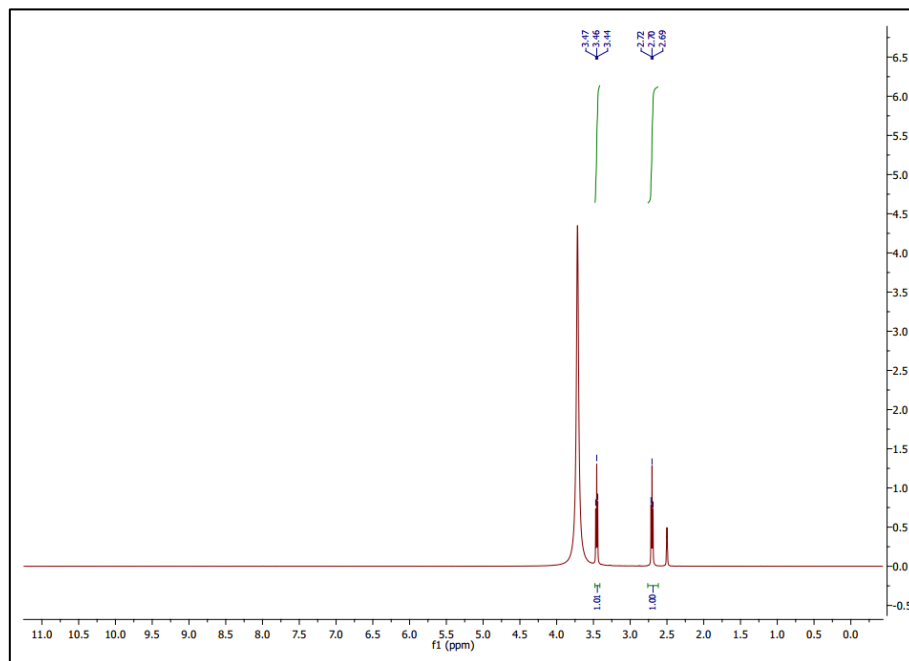

**Fig. S2.**  $^1\text{H}$ -NMR spectra of Mg@MEA metallogel.

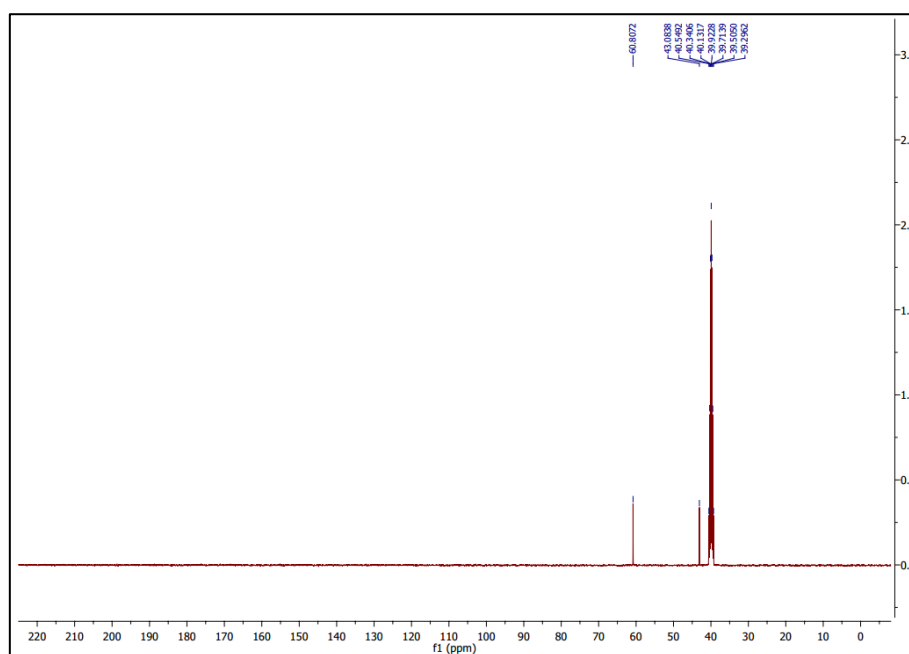

**Fig. S3.**  $^{13}\text{C}$ -NMR spectra of Mg@MEA metallogel.

### Infrared spectroscopic analysis:

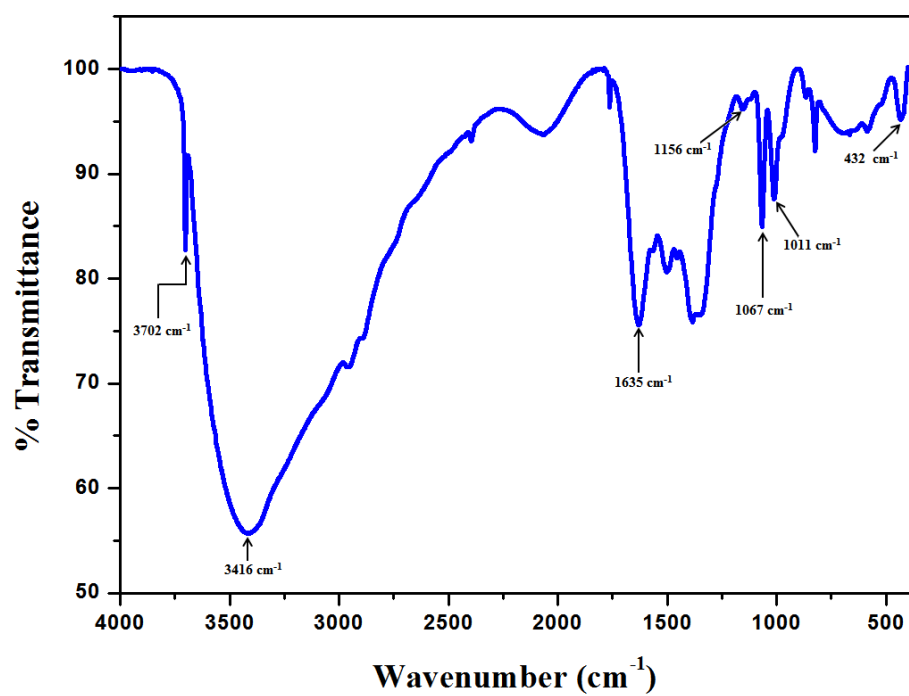

**Fig. S4.** Infrared-spectral study of Mg@MEA metallogel.
